# Supplementary material for: A Metabolism-Related Gene Prognostic Index for Prediction of Response to Immunotherapy in Lung Adenocarcinoma
Source: MDPI journal article supplement (doi:10.3390/ijms232012143), 2022-10-12
Supplement: s1 [file s1]

**Table S2. Clinical information of TCGA cohort**

| Variable             |           | MRG-high<br>(n = 250) | MRG-low<br>(n = 250) | P-value |
|----------------------|-----------|-----------------------|----------------------|---------|
| Age                  | ≥66       | 117(48%)              | 135(56%)             | 0.164   |
|                      | < 65      | 128(52%)              | 108(44%)             |         |
| Gender               | Female    | 120(48%)              | 150(60%)             | 0.009   |
|                      | Male      | 130(52%)              | 100(40%)             |         |
| Distant metastasis   | M0        | 165(67%)              | 167(67%)             | 0.905   |
|                      | M1        | 13(5%)                | 11(4%)               |         |
|                      | MX        | 69(28%)               | 71(29%)              |         |
|                      | N0        | 149(60%)              | 175(70%)             |         |
| Regional lymph nodes | N1        | 55(22%)               | 39(16%)              | 0.079   |
|                      | N2        | 39(16%)               | 30(12%)              |         |
|                      | N3        | 2(1%)                 | 0(0%)                |         |
|                      | NX        | 4(2%)                 | 6(2%)                |         |
| Tumor stage          | Stage I   | 115(47%)              | 153(62%)             | 0.007   |
|                      | Stage II  | 71(29%)               | 48(20%)              |         |
|                      | Stage III | 46(19%)               | 34(14%)              |         |
|                      | Stage IV  | 14(6%)                | 11(4%)               |         |
| Primary tumor        | T 1       | 71(28%)               | 96(38%)              | 0.2     |
|                      | T 2       | 143(57%)              | 124(50%)             |         |
|                      | T 3       | 25(10%)               | 20(8%)               |         |
|                      | T 4       | 9(4%)                 | 9(4%)                |         |
|                      | T X       | 2(1%)                 | 1(0%)                |         |
| Survival status      | Alive     | 142(57%)              | 176(70%)             | 0.002   |
|                      | Dead      | 108(43%)              | 74(30%)              |         |
