# Supplementary material for: A Metabolism-Related Gene Prognostic Index for Prediction of Response to Immunotherapy in Lung Adenocarcinoma
Source: MDPI journal article supplement (doi:10.3390/ijms232012143), 2022-10-12
Supplement: s1 [file s1]

**Table S5. Detailed information on ICI response analysis in different MRG subgroups**

| ID         | Age | Sex    | Immunotherapy drug | PFS event | PFS(years) | MRG score    | MRG  | Response      |
|------------|-----|--------|--------------------|-----------|------------|--------------|------|---------------|
| GSM2445691 | 44  | Female | Nivolumab          | Dead      | 0.96666667 | 0.190427049  | high | Non-responder |
| GSM2445692 | 53  | Male   | Nivolumab          | Alive     | 12.1       | 0.182545713  | high | Responder     |
| GSM2445699 | 61  | Male   | Pembrolizumab      | Dead      | 6.86666667 | 0.110747342  | high | Responder     |
| GSM3589675 | 47  | Male   | Nivolumab          | /         | /          | 0.100025146  | high | Responder     |
| GSM2445701 | 70  | Male   | Pembrolizumab      | Alive     | 4.9        | 0.099949091  | high | Responder     |
| GSM2445700 | 42  | Male   | Pembrolizumab      | Dead      | 3.46666667 | 0.097634361  | high | Responder     |
| GSM3589680 | 64  | Male   | Nivolumab          | /         | /          | 0.09642655   | high | Non-responder |
| GSM3589686 | 72  | Male   | Nivolumab          | /         | /          | 0.089002044  | high | Non-responder |
| GSM3589682 | 75  | Male   | Nivolumab          | /         | /          | 0.07459559   | high | Non-responder |
| GSM2445695 | 46  | Female | Nivolumab          | Dead      | 20.7       | 0.063246578  | high | Responder     |
| GSM3589677 | 58  | Male   | Nivolumab          | /         | /          | 0.062349636  | high | Responder     |
| GSM3589676 | 65  | Male   | Nivolumab          | /         | /          | 0.019919146  | high | Responder     |
| GSM3589678 | 55  | Female | Nivolumab          | /         | /          | 0.018237011  | high | Non-responder |
| GSM2445696 | 61  | Male   | Pembrolizumab      | Dead      | 18.7       | 0.015464987  | high | Responder     |
| GSM2445702 | 61  | Female | Nivolumab          | Dead      | 2.8        | -0.010517452 | low  | Non-responder |
| GSM3589688 | 34  | Female | Nivolumab          | /         | /          | -0.054191376 | low  | Responder     |
| GSM2445694 | 52  | Male   | Nivolumab          | Dead      | 6.3        | -0.054310341 | low  | Responder     |
| GSM3589684 | 67  | Male   | Nivolumab          | /         | /          | -0.061575523 | low  | Non-responder |
| GSM2445697 | 66  | Male   | Pembrolizumab      | Dead      | 0.7        | -0.079043605 | low  | Non-responder |
| GSM3589683 | 54  | Male   | Nivolumab          | /         | /          | -0.08253213  | low  | Responder     |
| GSM3589679 | 56  | Male   | Nivolumab          | /         | /          | -0.087495488 | low  | Non-responder |
| GSM2445693 | 51  | Male   | Pembrolizumab      | Dead      | 1.4        | -0.092421248 | low  | Non-responder |
| GSM3589681 | 65  | Male   | Nivolumab          | /         | /          | -0.101236124 | low  | Non-responder |
| GSM3589674 | 76  | Male   | Nivolumab          | /         | /          | -0.146002015 | low  | Non-responder |
| GSM2445698 | 47  | Female | Pembrolizumab      | Dead      | 0.7        | -0.146799107 | low  | Non-responder |
| GSM3589687 | 66  | Male   | Nivolumab          | /         | /          | -0.147966044 | low  | Non-responder |
| GSM3589685 | 61  | Male   | Nivolumab          | /         | /          | -0.215875455 | low  | Non-responder |
| GSM3589673 | 72  | Male   | Nivolumab          | /         | /          | -0.216036899 | low  | Non-responder |
