# Supplementary material for: A Metabolism-Related Gene Prognostic Index for Prediction of Response to Immunotherapy in Lung Adenocarcinoma
Source: MDPI journal article supplement (doi:10.3390/ijms232012143), 2022-10-12
Supplement: s1 [file s1]

**Table S1. List of 72 genes used for NMF analysis**

| <b>Gene ID</b>  | <b>HR</b> | <b>HR.95L</b> | <b>HR.95H</b> | <b>P-value</b>         |
|-----------------|-----------|---------------|---------------|------------------------|
| <i>SLC2A1</i>   | 1.337703  | 1.17351       | 1.52487       | 1.33×10 <sup>-05</sup> |
| <i>TYMS</i>     | 1.302313  | 1.133885      | 1.49576       | 0.000185               |
| <i>GAPDH</i>    | 1.690166  | 1.355751      | 2.107069      | 3.08×10 <sup>-06</sup> |
| <i>TP11</i>     | 1.624025  | 1.252982      | 2.104945      | 0.000248               |
| <i>PKM</i>      | 1.699031  | 1.294987      | 2.229139      | 0.00013                |
| <i>CFTR</i>     | 0.770124  | 0.660065      | 0.898534      | 0.000901               |
| <i>PFKP</i>     | 1.296363  | 1.129827      | 1.487446      | 0.000216               |
| <i>CDKN3</i>    | 1.357364  | 1.17077       | 1.573695      | 5.13×10 <sup>-05</sup> |
| <i>HMGA1</i>    | 1.327329  | 1.159703      | 1.519183      | 3.94×10 <sup>-05</sup> |
| <i>GPI</i>      | 1.505531  | 1.212517      | 1.869355      | 0.000211               |
| <i>RAD51</i>    | 1.361998  | 1.145176      | 1.61987       | 0.000479               |
| <i>SELENBP1</i> | 0.833451  | 0.749218      | 0.927153      | 0.000804               |
| <i>TK1</i>      | 1.347741  | 1.164589      | 1.559697      | 6.21×10 <sup>-05</sup> |
| <i>PAICS</i>    | 1.428041  | 1.168826      | 1.744742      | 0.00049                |
| <i>TFAP2A</i>   | 1.256636  | 1.105831      | 1.428006      | 0.000461               |
| <i>HMMR</i>     | 1.407814  | 1.210083      | 1.637854      | 9.45×10 <sup>-06</sup> |
| <i>CDK1</i>     | 1.283304  | 1.123426      | 1.465935      | 0.000238               |
| <i>FANCI</i>    | 1.301766  | 1.120274      | 1.512662      | 0.000576               |
| <i>FEN1</i>     | 1.42669   | 1.165886      | 1.745834      | 0.00056                |
| <i>ARNTL2</i>   | 1.374399  | 1.20538       | 1.567119      | 2.03×10 <sup>-06</sup> |
| <i>RRM2</i>     | 1.323105  | 1.165783      | 1.501657      | 1.46×10 <sup>-05</sup> |
| <i>FOXM1</i>    | 1.243634  | 1.116179      | 1.385644      | 7.74×10 <sup>-05</sup> |
| <i>BIRC5</i>    | 1.264114  | 1.105892      | 1.444973      | 0.000592               |
| <i>AURKA</i>    | 1.276108  | 1.107286      | 1.470669      | 0.000758               |
| <i>CCNA2</i>    | 1.34128   | 1.167933      | 1.540355      | 3.20×10 <sup>-05</sup> |
| <i>IGF2BP3</i>  | 1.185289  | 1.071358      | 1.311337      | 0.000978               |
| <i>CDX2</i>     | 1.459333  | 1.206824      | 1.764675      | 9.65×10 <sup>-05</sup> |
| <i>PLK1</i>     | 1.406757  | 1.217405      | 1.62556       | 3.71×10 <sup>-06</sup> |
| <i>MKI67</i>    | 1.36455   | 1.160958      | 1.603846      | 0.000163               |
| <i>KPNA2</i>    | 1.424799  | 1.18977       | 1.706256      | 0.000119               |
| <i>GGTLC1</i>   | 0.825819  | 0.741522      | 0.9197        | 0.000495               |
| <i>HMGA2</i>    | 1.20183   | 1.08671       | 1.329145      | 0.000345               |
| <i>CCT6A</i>    | 1.485202  | 1.236351      | 1.784142      | 2.36×10 <sup>-05</sup> |
| <i>PKMYT1</i>   | 1.395169  | 1.146681      | 1.697506      | 0.000876               |
| <i>CCNB1</i>    | 1.33684   | 1.168922      | 1.528879      | 2.24×10 <sup>-05</sup> |
| <i>PTTG1</i>    | 1.343444  | 1.143892      | 1.577807      | 0.00032                |
| <i>UBE2S</i>    | 1.270829  | 1.114907      | 1.448556      | 0.000332               |
| <i>CDC25C</i>   | 1.550146  | 1.256819      | 1.911933      | 4.21×10 <sup>-05</sup> |
| <i>EIF3B</i>    | 1.578799  | 1.20303       | 2.07194       | 0.000992               |
| <i>CENPF</i>    | 1.267328  | 1.103083      | 1.456028      | 0.000822               |
| <i>EXO1</i>     | 1.407629  | 1.206433      | 1.642377      | 1.39×10 <sup>-05</sup> |

|                 |          |          |          |                        |
|-----------------|----------|----------|----------|------------------------|
| <i>SPC25</i>    | 1.364324 | 1.162458 | 1.601244 | 0.000143               |
| <i>CDC20</i>    | 1.189893 | 1.075457 | 1.316506 | 0.000752               |
| <i>ASPM</i>     | 1.227216 | 1.103134 | 1.365255 | 0.000167               |
| <i>LYPD3</i>    | 1.236474 | 1.131892 | 1.35072  | 2.51×10 <sup>-06</sup> |
| <i>FKBP4</i>    | 1.545077 | 1.278105 | 1.867814 | 6.95×10 <sup>-06</sup> |
| <i>PKP2</i>     | 1.389498 | 1.223867 | 1.577544 | 3.79×10 <sup>-07</sup> |
| <i>BCAN</i>     | 1.516268 | 1.200843 | 1.914547 | 0.000469               |
| <i>NEIL3</i>    | 1.284988 | 1.118872 | 1.475767 | 0.000385               |
| <i>CKS1B</i>    | 1.338641 | 1.13781  | 1.574919 | 0.000437               |
| <i>ABCA3</i>    | 0.84763  | 0.772775 | 0.929737 | 0.000458               |
| <i>LDHA</i>     | 1.990925 | 1.53424  | 2.583547 | 2.22×10 <sup>-07</sup> |
| <i>F2</i>       | 1.209459 | 1.082727 | 1.351025 | 0.000759               |
| <i>ALDOA</i>    | 1.535959 | 1.209518 | 1.950505 | 0.000431               |
| <i>ANGPTL4</i>  | 1.197642 | 1.091004 | 1.314703 | 0.00015                |
| <i>ABCC2</i>    | 1.159944 | 1.084812 | 1.240279 | 1.41×10 <sup>-05</sup> |
| <i>CYP4B1</i>   | 0.867625 | 0.81192  | 0.927151 | 2.74×10 <sup>-05</sup> |
| <i>SFTPD</i>    | 0.908937 | 0.858744 | 0.962063 | 0.000986               |
| <i>NPAS2</i>    | 1.490016 | 1.225973 | 1.810929 | 6.15×10 <sup>-05</sup> |
| <i>CACNA2D2</i> | 0.847798 | 0.775074 | 0.927346 | 0.000308               |
| <i>KRT8</i>     | 1.513487 | 1.25215  | 1.829368 | 1.83×10 <sup>-05</sup> |
| <i>KRT18</i>    | 1.511776 | 1.251879 | 1.82563  | 1.75×10 <sup>-05</sup> |
| <i>SMOX</i>     | 1.353578 | 1.16089  | 1.578248 | 0.000112               |
| <i>CKAP4</i>    | 1.497898 | 1.187785 | 1.888978 | 0.00064                |
| <i>ARRB1</i>    | 0.706487 | 0.581606 | 0.858183 | 0.000463               |
| <i>PRSS3</i>    | 1.20465  | 1.085005 | 1.337489 | 0.000486               |
| <i>CRTAC1</i>   | 0.80888  | 0.715563 | 0.914366 | 0.000695               |
| <i>GRIA1</i>    | 0.520238 | 0.358448 | 0.755053 | 0.000585               |
| <i>B4GALT4</i>  | 1.426044 | 1.167697 | 1.741549 | 0.000501               |
| <i>KRT6A</i>    | 1.164779 | 1.09872  | 1.23481  | 3.05×10 <sup>-07</sup> |
| <i>LIFR</i>     | 0.747381 | 0.637647 | 0.876001 | 0.000326               |
| <i>DPYSL2</i>   | 0.731915 | 0.623681 | 0.858932 | 0.000132               |

---
