# Supplementary material for: A Metabolism-Related Gene Prognostic Index for Prediction of Response to Immunotherapy in Lung Adenocarcinoma
Source: MDPI journal article supplement (doi:10.3390/ijms232012143), 2022-10-12
Supplement: s1 [file s1]

**Table S4. Detailed data on GSVA analysis of MRG subgroups**

| <b>ID</b>                                      | <b>logFC</b> | <b>AveExpr</b> | <b>t</b>     | <b>P-value × 10</b>    | <b>adj.P.Val</b>       | <b>B</b>    |
|------------------------------------------------|--------------|----------------|--------------|------------------------|------------------------|-------------|
| KEGG_CELL_CYCLE                                | -0.225207611 | -0.045163921   | -17.2359039  | $4.00 \times 10^{-60}$ | $7.33 \times 10^{-58}$ | 125.9456841 |
| KEGG_DNA_REPLICATION                           | -0.317298913 | -0.051967277   | -15.77397323 | $1.98 \times 10^{-51}$ | $1.82 \times 10^{-49}$ | 106.0796504 |
| KEGG_HOMOLOGOUS_RECOMBINATION                  | -0.240618871 | -0.03969603    | -14.41653994 | $7.98 \times 10^{-44}$ | $4.87 \times 10^{-42}$ | 88.71503481 |
| KEGG_MISMATCH_REPAIR                           | -0.236981035 | -0.045701335   | -13.15952469 | $3.18 \times 10^{-37}$ | $1.46 \times 10^{-35}$ | 73.65368516 |
| KEGG_FATTY_ACID_METABOLISM                     | 0.185984648  | 0.002429009    | 12.68049048  | $7.93 \times 10^{-35}$ | $2.90 \times 10^{-33}$ | 68.18900362 |
| KEGG_PROTEASOME                                | -0.234924809 | -0.035642788   | -12.30030645 | $5.65 \times 10^{-33}$ | $1.72 \times 10^{-31}$ | 63.9645967  |
| KEGG_BASE_EXCISION_REPAIR                      | -0.193689727 | -0.027352509   | -12.18054839 | $2.12 \times 10^{-32}$ | $5.02 \times 10^{-31}$ | 62.65493467 |
| KEGG_PRIMARY_BILE_ACID_BIOSYNTHESIS            | 0.181022337  | 0.033351227    | 12.17745842  | $2.20 \times 10^{-32}$ | $5.02 \times 10^{-31}$ | 62.6212777  |
| KEGG_DRUG_METABOLISM_CYTOCHROME_P450           | 0.146083947  | 0.028841926    | 10.99736978  | $5.80 \times 10^{-27}$ | $1.06 \times 10^{-25}$ | 50.27406765 |
| KEGG_NUCLEOTIDE_EXCISION_REPAIR                | -0.147924218 | -0.034548422   | -10.81772909 | $3.54 \times 10^{-26}$ | $5.90 \times 10^{-25}$ | 48.48527264 |
| KEGG_HISTIDINE_METABOLISM                      | 0.141129397  | 0.021983192    | 10.61525126  | $2.65 \times 10^{-25}$ | $3.73 \times 10^{-24}$ | 46.49859028 |
| KEGG_PYRIMIDINE_METABOLISM                     | -0.131300778 | -0.022236469   | -10.30465471 | $5.45 \times 10^{-24}$ | $7.12 \times 10^{-23}$ | 43.51254164 |
| KEGG_VALINE_LEUCINE_AND_ISOLEUCINE_DEGRADATION | 0.153478623  | -0.007471823   | 10.04483988  | $6.45 \times 10^{-23}$ | $7.87 \times 10^{-22}$ | 41.07258011 |
| KEGG_BASAL_TRANSCRIPTION_FACTORS               | -0.125528537 | -0.027725673   | -9.929554774 | $1.90 \times 10^{-22}$ | $2.17 \times 10^{-21}$ | 40.00698728 |
| KEGG_OTHER_GLYCAN_DEGRADATION                  | 0.175800955  | 0.019427585    | 9.890367118  | $2.74 \times 10^{-22}$ | $2.94 \times 10^{-21}$ | 39.64717574 |
| KEGG_P53_SIGNALING_PATHWAY                     | -0.100263498 | -0.022502686   | -9.501342592 | $9.57 \times 10^{-21}$ | $9.73 \times 10^{-20}$ | 36.14194905 |
| KEGG_ONE_CARBON_POOL_BY_FOLATE                 | -0.152203061 | -0.017954202   | -9.443422851 | $1.61 \times 10^{-20}$ | $1.55 \times 10^{-19}$ | 35.63051451 |
| KEGG_CIRCADIAN_RHYTHM_MAMMAL                   | 0.141519034  | 0.007701052    | 8.955475119  | $1.14 \times 10^{-18}$ | $1.04 \times 10^{-17}$ | 31.43077148 |
| KEGG_SPLICEOSOME                               | -0.116852261 | -0.035182057   | -8.608683432 | $2.10 \times 10^{-17}$ | $1.83 \times 10^{-16}$ | 28.56573926 |
| KEGG_TYROSINE_METABOLISM                       | 0.101960565  | 0.015974197    | 8.354365901  | $1.67 \times 10^{-16}$ | $1.27 \times 10^{-15}$ | 26.52887523 |
| KEGG_RNA_DEGRADATION                           | -0.110027214 | -0.031188691   | -8.246568899 | $3.94 \times 10^{-16}$ | $2.89 \times 10^{-15}$ | 25.68205594 |

|                                                      |              |              |              |                        |                        |             |
|------------------------------------------------------|--------------|--------------|--------------|------------------------|------------------------|-------------|
| KEGG_METABOLISM_OF_XENOBIOTICS_BY_CYTOCHROME_P450    | 0.110526159  | 0.023576746  | 8.131884881  | $9.76 \times 10^{-16}$ | $6.87 \times 10^{-15}$ | 24.79201236 |
| KEGG_GLYOXYLATE_AND_DICARBOXYLATE_METABOLISM         | -0.131759846 | -0.015322131 | -7.953789533 | $3.90 \times 10^{-15}$ | $2.46 \times 10^{-14}$ | 23.43218524 |
| KEGG_BUTANOATE_METABOLISM                            | 0.108293295  | 0.001410922  | 7.912051019  | $5.37 \times 10^{-15}$ | $3.28 \times 10^{-14}$ | 23.11744302 |
| KEGG_GLYCOSAMINOGLYCAN_BIOSYNTHESIS_KE RATAN_SULFATE | -0.123290563 | -0.001048055 | -7.841212415 | $9.23 \times 10^{-15}$ | $5.28 \times 10^{-14}$ | 22.58670561 |
| KEGG_PENTOSE_PHOSPHATE_PATHWAY                       | -0.106393055 | -0.023826327 | -7.731243043 | $2.12 \times 10^{-14}$ | $1.18 \times 10^{-13}$ | 21.77139979 |
| KEGG_RIBOFLAVIN_METABOLISM                           | -0.108296032 | -0.006994459 | -7.598857218 | $5.69 \times 10^{-14}$ | $2.89 \times 10^{-13}$ | 20.80384056 |
| KEGG_PROTEIN_EXPORT                                  | -0.12085673  | -0.017445634 | -6.757424103 | $2.11 \times 10^{-11}$ | $8.59 \times 10^{-11}$ | 15.01458434 |
| KEGG_ASCORBATE_AND_ALDARATE_METABOLISM               | 0.111771933  | 0.001745669  | 6.497924542  | $1.16 \times 10^{-10}$ | $4.41 \times 10^{-10}$ | 13.3565485  |
| KEGG_NON_HOMOLOGOUS_END_JOINING                      | -0.11295284  | -0.02409945  | -6.309871893 | $3.82 \times 10^{-10}$ | $1.34 \times 10^{-09}$ | 12.19304269 |
| KEGG_CELL_CYCLE                                      | -0.2252076   | -0.04516392  | -17.2359039  | $4.00 \times 10^{-60}$ | $7.33 \times 10^{-58}$ | 125.9456841 |
| KEGG_DNA_REPLICATION                                 | -0.317298913 | -0.051967277 | -15.77397323 | $1.98 \times 10^{-51}$ | $1.82 \times 10^{-49}$ | 106.0796504 |
| KEGG_HOMOLOGOUS_RECOMBINATION                        | -0.240618871 | -0.03969603  | -14.41653994 | $7.98 \times 10^{-44}$ | $4.87 \times 10^{-42}$ | 88.71503481 |
| KEGG_MISMATCH_REPAIR                                 | -0.236981035 | -0.045701335 | -13.15952469 | $3.18 \times 10^{-37}$ | $1.46 \times 10^{-35}$ | 73.65368516 |
| KEGG_FATTY_ACID_METABOLISM                           | 0.185984648  | 0.002429009  | 12.68049048  | $7.93 \times 10^{-35}$ | $2.90 \times 10^{-33}$ | 68.18900362 |
| KEGG_PROTEASOME                                      | -0.234924809 | -0.035642788 | -12.30030645 | $5.65 \times 10^{-33}$ | $1.72 \times 10^{-31}$ | 63.9645967  |
| KEGG_BASE_EXCISION_REPAIR                            | -0.193689727 | -0.027352509 | -12.18054839 | $2.12 \times 10^{-32}$ | $5.02 \times 10^{-31}$ | 62.65493467 |
| KEGG_PRIMARY_BILE_ACID_BIOSYNTHESIS                  | 0.181022337  | 0.033351227  | 12.17745842  | $2.20 \times 10^{-32}$ | $5.02 \times 10^{-31}$ | 62.6212777  |
| KEGG_DRUG_METABOLISM_CYTOCHROME_P450                 | 0.146083947  | 0.028841926  | 10.99736978  | $5.80 \times 10^{-27}$ | $1.06 \times 10^{-25}$ | 50.27406765 |
| KEGG_NUCLEOTIDE_EXCISION_REPAIR                      | -0.147924218 | -0.034548422 | -10.81772909 | $3.54 \times 10^{-26}$ | $5.90 \times 10^{-25}$ | 48.48527264 |
| KEGG_HISTIDINE_METABOLISM                            | 0.141129397  | 0.021983192  | 10.61525126  | $2.65 \times 10^{-25}$ | $3.73 \times 10^{-24}$ | 46.49859028 |
| KEGG_PYRIMIDINE_METABOLISM                           | -0.131300778 | -0.022236469 | -10.30465471 | $5.45 \times 10^{-24}$ | $7.12 \times 10^{-23}$ | 43.51254164 |

|                                                     |              |              |              |                        |                        |             |
|-----------------------------------------------------|--------------|--------------|--------------|------------------------|------------------------|-------------|
| KEGG_VALINE_LEUCINE_AND_ISOLEUCINE_DEGRADATION      | 0.153478623  | -0.007471823 | 10.04483988  | $6.45 \times 10^{-23}$ | $7.87 \times 10^{-22}$ | 41.07258011 |
| KEGG_BASAL_TRANSCRIPTION_FACTORS                    | -0.125528537 | -0.027725673 | -9.929554774 | $1.90 \times 10^{-22}$ | $2.17 \times 10^{-21}$ | 40.00698728 |
| KEGG_OTHER_GLYCAN_DEGRADATION                       | 0.175800955  | 0.019427585  | 9.890367118  | $2.74 \times 10^{-22}$ | $2.94 \times 10^{-21}$ | 39.64717574 |
| KEGG_P53_SIGNALING_PATHWAY                          | -0.100263498 | -0.022502686 | -9.501342592 | $9.57 \times 10^{-21}$ | $9.73 \times 10^{-20}$ | 36.14194905 |
| KEGG_ONE_CARBON_POOL_BY_FOLATE                      | -0.152203061 | -0.017954202 | -9.443422851 | $1.61 \times 10^{-20}$ | $1.55 \times 10^{-19}$ | 35.63051451 |
| KEGG_CIRCADIAN_RHYTHM_MAMMAL                        | 0.141519034  | 0.007701052  | 8.955475119  | $1.14 \times 10^{-18}$ | $1.04 \times 10^{-17}$ | 31.43077148 |
| KEGG_SPLICEOSOME                                    | -0.116852261 | -0.035182057 | -8.608683432 | $2.10 \times 10^{-17}$ | $1.83 \times 10^{-16}$ | 28.56573926 |
| KEGG_TYROSINE_METABOLISM                            | 0.101960565  | 0.015974197  | 8.354365901  | $1.67 \times 10^{-16}$ | $1.27 \times 10^{-15}$ | 26.52887523 |
| KEGG_RNA_DEGRADATION                                | -0.110027214 | -0.031188691 | -8.246568899 | $3.94 \times 10^{-16}$ | $2.89 \times 10^{-15}$ | 25.68205594 |
| KEGG_METABOLISM_OF_XENOBIOTICS_BY_CYTOCHROME_P450   | 0.110526159  | 0.023576746  | 8.131884881  | $9.76 \times 10^{-16}$ | $6.87 \times 10^{-15}$ | 24.79201236 |
| KEGG_GLYOXYLATE_AND_DICARBOXYLATE_METABOLISM        | -0.131759846 | -0.015322131 | -7.953789533 | $3.90 \times 10^{-15}$ | $2.46 \times 10^{-14}$ | 23.43218524 |
| KEGG_BUTANOATE_METABOLISM                           | 0.108293295  | 0.001410922  | 7.912051019  | $5.37 \times 10^{-15}$ | $3.28 \times 10^{-14}$ | 23.11744302 |
| KEGG_GLYCOSAMINOGLYCAN_BIOSYNTHESIS_KERATAN_SULFATE | -0.123290563 | -0.001048055 | -7.841212415 | $9.23 \times 10^{-15}$ | $5.28 \times 10^{-14}$ | 22.58670561 |
| KEGG_PENTOSE_PHOSPHATE_PATHWAY                      | -0.106393055 | -0.023826327 | -7.731243043 | $2.12 \times 10^{-14}$ | $1.18 \times 10^{-13}$ | 21.77139979 |
