# Supplementary material for: A Metabolism-Related Gene Prognostic Index for Prediction of Response to Immunotherapy in Lung Adenocarcinoma
Source: MDPI journal article supplement (doi:10.3390/ijms232012143), 2022-10-12
Supplement: s1 [file s1]

**Table S3. Detailed data on GSEA analysis of TCGA MRG subgroups**

| <b>ID</b>                                         | <b>Enrichment score</b> | <b>NES</b>   | <b>P-value</b>         | <b>P.adjust</b>       |
|---------------------------------------------------|-------------------------|--------------|------------------------|-----------------------|
| KEGG_CELL_CYCLE                                   | 0.703911286             | 2.592899864  | $1.00 \times 10^{-10}$ | $1.84 \times 10^{-8}$ |
| KEGG_DNA_REPLICATION                              | 0.757108667             | 2.218431307  | $1.57 \times 10^{-6}$  | 0.000144071           |
| KEGG_SPLICEOSOME                                  | 0.53070727              | 1.968987763  | $3.82 \times 10^{-6}$  | 0.00023437            |
| KEGG_OOCYTE_MEIOSIS                               | 0.56536538              | 2.004376743  | $1.49 \times 10^{-5}$  | 0.000686194           |
| KEGG_SYSTEMIC_LUPUS_ERYTHEMATOSUS                 | 0.534834865             | 1.927804298  | $2.24 \times 10^{-5}$  | 0.000824956           |
| KEGG_ASTHMA                                       | -0.781699305            | -2.007590278 | $3.13 \times 10^{-5}$  | 0.00095854            |
| KEGG_PROTEASOME                                   | 0.651067224             | 2.010354982  | 0.000186927            | 0.004913518           |
| KEGG_P53_SIGNALING_PATHWAY                        | 0.565815999             | 1.896765453  | 0.000276954            | 0.00636994            |
| KEGG_MISMATCH_REPAIR                              | 0.726295169             | 1.956867861  | 0.000771868            | 0.015780409           |
| KEGG_HOMOLOGOUS_RECOMBINATION                     | 0.688952263             | 1.940342797  | 0.001004316            | 0.016875488           |
| KEGG_PROGESTERONE_MEDIATED_OOCYTE_MATURATION      | 0.534730471             | 1.81566744   | 0.001089985            | 0.016875488           |
| KEGG_ECM_RECEPTOR_INTERACTION                     | 0.52006321              | 1.762332897  | 0.001100575            | 0.016875488           |
| KEGG_SMALL_CELL_LUNG_CANCER                       | 0.498327834             | 1.707715459  | 0.001332201            | 0.01885577            |
| KEGG_INTESTINAL_IMMUNE_NETWORK_FOR_IGA_PRODUCTION | -0.603535824            | -1.794408479 | 0.002027265            | 0.026644049           |
| KEGG_PATHWAYS_IN_CANCER                           | 0.349778265             | 1.421836743  | 0.002374366            | 0.029125555           |
| KEGG_PYRIMIDINE_METABOLISM                        | 0.448521074             | 1.585958075  | 0.003820142            | 0.043931631           |
| KEGG_MELANOMA                                     | 0.519541195             | 1.677988302  | 0.006616399            | 0.071612784           |
| KEGG_FOCAL_ADHESION                               | 0.363289754             | 1.394735251  | 0.012593186            | 0.128730344           |
| KEGG_VIRAL_MYOCARDITIS                            | -0.475658927            | -1.557048802 | 0.015970956            | 0.149426937           |
| KEGG_BASE_EXCISION_REPAIR                         | 0.555958411             | 1.625940329  | 0.016242058            | 0.149426937           |
| KEGG_REGULATION_OF_ACTIN_CYTOSKELETON             | 0.356113135             | 1.363416678  | 0.017972447            | 0.153590761           |
| KEGG_CITRATE_CYCLE_TCA_CYCLE                      | 0.579206705             | 1.644208568  | 0.018364113            | 0.153590761           |
| KEGG_NEUROACTIVE_LIGAND_RECEPTOR_INTERACTION      | 0.397299196             | 1.430496072  | 0.019277718            | 0.154221745           |
| KEGG_RNA_DEGRADATION                              | 0.478038859             | 1.548688235  | 0.020583665            | 0.157295335           |
| KEGG_AMINOACYL_TRNA_BIOSYNTHESIS                  | 0.523600756             | 1.605032395  | 0.021739377            | 0.157295335           |
| KEGG_PATHOGENIC_ESCHERICHIA_COLI_INFECTION        | 0.480519902             | 1.521256167  | 0.022642439            | 0.157295335           |
| KEGG_NUCLEOTIDE_EXCISION_REPAIR                   | 0.519663542             | 1.60460879   | 0.023081381            | 0.157295335           |
| KEGG_DRUG_METABOLISM_OTHER_ENZYMES                | 0.575149495             | 1.638807521  | 0.028155499            | 0.18502185            |
| KEGG_UBIQUITIN_MEDIATED_PROTEOLYSIS               | 0.378439755             | 1.406633492  | 0.030752587            | 0.195119864           |
| KEGG_FC_EPSILON_RI_SIGNALING_PATHWAY              | -0.410875259            | -1.367060244 | 0.046728972            | 0.281097597           |
| KEGG_ALLOGRAFT_REJECTION                          | -0.524213183            | -1.482498273 | 0.047358834            | 0.281097597           |

**Table S3. Detailed data on GSEA analysis of GSE68465 MRG subgroups**

| ID                                           | Enrichment score | NES         | P-value                | P.adjust              |
|----------------------------------------------|------------------|-------------|------------------------|-----------------------|
| KEGG_CELL_CYCLE                              | 0.66832875       | 2.528008252 | $1.00 \times 10^{-10}$ | $1.83 \times 10^{-8}$ |
| KEGG_SPLICEOSOME                             | 0.552586013      | 2.038039936 | $1.60 \times 10^{-6}$  | 0.000146233           |
| KEGG_PROTEASOME                              | 0.717440865      | 2.25680462  | $2.59 \times 10^{-6}$  | 0.000157886           |
| KEGG_DNA_REPLICATION                         | 0.731683489      | 2.227160948 | $3.56 \times 10^{-6}$  | 0.000162994           |
| KEGG_PYRIMIDINE_METABOLISM                   | 0.53230305       | 1.858454927 | 0.00026267             | 0.009614049           |
| KEGG_PARKINSONS_DISEASE                      | 0.500204419      | 1.800510314 | 0.00071959             | 0.018812195           |
| KEGG_OXIDATIVE_PHOSPHORYLATION               | 0.501229403      | 1.792179479 | 0.00063811             | 0.018812195           |
| KEGG_P53_SIGNALING_PATHWAY                   | 0.538212425      | 1.802692269 | 0.00087925             | 0.019828053           |
| KEGG_OOCYTE_MEIOSIS                          | 0.481200675      | 1.748645875 | 0.00097515             | 0.019828053           |
| KEGG_MISMATCH_REPAIR                         | 0.68647668       | 1.895399924 | 0.00202624             | 0.033709342           |
| KEGG_DRUG_METABOLISM_CYTOCHROME_P450         | -0.520644276     | -1.79334852 | 0.00191585             | 0.033709342           |
| KEGG_NUCLEOTIDE_EXCISION_REPAIR              | 0.542513232      | 1.73701444  | 0.00377149             | 0.05554313            |
| KEGG_GLYCEROPHOSPHOLIPID_METABOLISM          | -0.480423407     | -1.68136871 | 0.00394568             | 0.05554313            |
| KEGG_HOMOLOGOUS_RECOMBINATION                | 0.630591674      | 1.81560194  | 0.00438307             | 0.057293096           |
| KEGG_VASCULAR_SMOOTH_MUSCLE_CONTRACTION      | -0.422099755     | -1.62511204 | 0.00500142             | 0.061017416           |
| KEGG_PRIMARY_BILE_ACID_BIOSYNTHESIS          | -0.727729244     | -1.86394231 | 0.00623629             | 0.06426892            |
| KEGG_BASE_EXCISION_REPAIR                    | 0.579648412      | 1.717530952 | 0.00688472             | 0.06426892            |
| KEGG_COMPLEMENT_AND_COAGULATION_CASCADES     | -0.457117279     | -1.64120290 | 0.00602428             | 0.06426892            |
| KEGG_VIRAL_MYOCARDITIS                       | -0.452060575     | -1.61927854 | 0.00673733             | 0.06426892            |
| KEGG_NEUROACTIVE_LIGAND_RECEPTOR_INTERACTION | -0.31338204      | -1.37700661 | 0.00702392             | 0.06426892            |
| KEGG_PPAR_SIGNALING_PATHWAY                  | -0.452794016     | -1.60193726 | 0.00979001             | 0.085313013           |
| KEGG_CITRATE_CYCLE_TCA_CYCLE                 | 0.563825309      | 1.670646206 | 0.01097455             | 0.091288367           |
| KEGG_FATTY_ACID_METABOLISM                   | -0.507833418     | -1.65151733 | 0.01340825             | 0.098148397           |
| KEGG_RNA_DEGRADATION                         | 0.507454392      | 1.632771279 | 0.01322218             | 0.098148397           |
| KEGG_LYSOSOME                                | -0.369348259     | -1.44329290 | 0.01257482             | 0.098148397           |
| KEGG_NITROGEN_METABOLISM                     | -0.588371683     | -1.68466010 | 0.01639330             | 0.107528217           |
| KEGG_ARACHIDONIC_ACID_METABOLISM             | -0.478119667     | -1.60548892 | 0.01555500             | 0.107528217           |
| KEGG_AMYOTROPHIC_LATERAL_SCLEROSIS_ALS       | 0.471705399      | 1.543708225 | 0.01799081             | 0.107528217           |
| KEGG_HYPERTROPHIC_CARDIOMYOPATHY_HCM         | -0.403924467     | -1.49333244 | 0.01751435             | 0.107528217           |
| KEGG_UBIQUITIN_MEDIATED_PROTEOLYSIS          | 0.394689017      | 1.488479172 | 0.01791631             | 0.107528217           |
| KEGG_MAPK_SIGNALING_PATHWAY                  | -0.305860926     | -1.34658990 | 0.01821516             | 0.107528217           |

**Table S3. Detailed data on GSEA analysis of GSE31210 MRG subgroups**

| ID                                                | Enrichment score | NES         | P-value                | P.adjust              |
|---------------------------------------------------|------------------|-------------|------------------------|-----------------------|
| KEGG_CELL_CYCLE                                   | 0.683687359      | 2.440632349 | $1.00 \times 10^{-10}$ | $1.84 \times 10^{-8}$ |
| KEGG_CYTOKINE_CYTOKINE_RECEPTOR_INTERACTION       | 0.511844551      | 1.96103749  | $2.45 \times 10^{-8}$  | $2.26 \times 10^{-6}$ |
| KEGG_DNA_REPLICATION                              | 0.72544663       | 2.101106771 | $2.12 \times 10^{-5}$  | 0.001298063           |
| KEGG_CHEMOKINE_SIGNALING_PATHWAY                  | 0.481004302      | 1.780589631 | $3.20 \times 10^{-5}$  | 0.001471231           |
| KEGG_PROTEASOME                                   | 0.681365785      | 2.001714868 | $6.04 \times 10^{-5}$  | 0.001741314           |
| KEGG_DRUG_METABOLISM_CYTOCHROME_P450              | -0.551411827     | -1.97258211 | $7.0 \times 10^{-5}$   | 0.001741314           |
| KEGG_ANTIGEN_PROCESSING_AND_PRESENTATION          | 0.588440152      | 1.922303009 | $4.76 \times 10^{-5}$  | 0.001741314           |
| KEGG_PYRIMIDINE_METABOLISM                        | 0.55183263       | 1.864975228 | $7.57 \times 10^{-5}$  | 0.001741314           |
| KEGG_METABOLISM_OF_XENOBIOTICS_BY_CYTOCHROME_P450 | -0.561561721     | -1.97795877 | $9.04 \times 10^{-5}$  | 0.001742724           |
| KEGG_PRIMARY_IMMUNODEFICIENCY                     | 0.68823861       | 1.975419433 | $9.47 \times 10^{-5}$  | 0.001742724           |
| KEGG_P53_SIGNALING_PATHWAY                        | 0.579939811      | 1.849019763 | 0.00014853             | 0.002294511           |
| KEGG_OOCYTE_MEIOSIS                               | 0.517096299      | 1.808241746 | 0.00014964             | 0.002294511           |
| KEGG_MISMATCH_REPAIR                              | 0.757439064      | 1.952164939 | 0.00019692             | 0.002787304           |
| KEGG_ECM_RECEPTOR_INTERACTION                     | 0.525021041      | 1.750877568 | 0.00081055             | 0.009942752           |
| KEGG_NATURAL_KILLER_CELL_MEDIATED_CYTOTOXICITY    | 0.474283149      | 1.697048953 | 0.00080204             | 0.009942752           |
| KEGG_NOD LIKE RECEPTOR SIGNALING PATHWAY          | 0.554217158      | 1.741948191 | 0.00171246             | 0.019693346           |
| KEGG_RETINOL_METABOLISM                           | -0.516965083     | -1.76373387 | 0.00211089             | 0.022847312           |
| KEGG_FATTY_ACID_METABOLISM                        | -0.522541148     | -1.74678837 | 0.00262208             | 0.025392788           |
| KEGG_GRAFT_VERSUS_HOST_DISEASE                    | 0.606904801      | 1.741970765 | 0.00250589             | 0.025392788           |
| KEGG_PENTOSE_PHOSPHATE_PATHWAY                    | 0.679206575      | 1.820304669 | 0.00298766             | 0.02748655            |
| KEGG_HOMOLOGOUS_RECOMBINATION                     | 0.665970733      | 1.784832006 | 0.00487305             | 0.042697222           |
| KEGG_BASE_EXCISION_REPAIR                         | 0.613513467      | 1.716547969 | 0.00576725             | 0.048235215           |
| KEGG_LEISHMANIA_INFECTION                         | 0.483973887      | 1.552583589 | 0.00745501             | 0.059640154           |
| KEGG_TOLL LIKE RECEPTOR SIGNALING PATHWAY         | 0.459068052      | 1.578559136 | 0.00853921             | 0.065467286           |
| KEGG_FC_GAMMA_R_MEDIATED_PHAGOCYTOSIS             | 0.456612006      | 1.541272807 | 0.00890828             | 0.065564996           |
| KEGG_VASCULAR_SMOOTH_MUSCLE_CONTRACTION           | -0.389542557     | -1.51364896 | 0.00998066             | 0.070632426           |
| KEGG_DILATED_CARDIOMYOPATHY                       | -0.388504236     | -1.48414097 | 0.01047399             | 0.071378357           |
| KEGG_BLADDER_CANCER                               | 0.54549217       | 1.604043116 | 0.01242718             | 0.081664344           |
| KEGG_CITRATE_CYCLE_TCA_CYCLE                      | 0.580595193      | 1.61922204  | 0.01347713             | 0.085510091           |
| KEGG_WNT_SIGNALING_PATHWAY                        | -0.331896316     | -1.33820717 | 0.02109897             | 0.129407039           |
| KEGG_RIBOFLAVIN_METABOLISM                        | 0.6758993        | 1.58953022  | 0.02234743             | 0.132642811           |

**Table S3. Detailed data on GSEA analysis of GSE50081 MRG subgroups**

| <b>ID</b>                                         | <b>Enrichment score</b> | <b>NES</b>  | <b>P-value</b>         | <b>P.adjust</b>       |
|---------------------------------------------------|-------------------------|-------------|------------------------|-----------------------|
| KEGG_CYTOKINE_CYTOKINE_RECEPTOR_INTERACTION       | 0.529428331             | 2.363568869 | $1.00 \times 10^{-10}$ | $1.84 \times 10^{-8}$ |
| KEGG_GRAFT_VERSUS_HOST_DISEASE                    | 0.749563407             | 2.404347474 | $9.06 \times 10^{-9}$  | $5.56 \times 10^{-7}$ |
| KEGG_CHEMOKINE_SIGNALING_PATHWAY                  | 0.4965547               | 2.124210355 | $6.09 \times 10^{-9}$  | $5.56 \times 10^{-7}$ |
| KEGG_TOLL_LIKE_RECEPTOR_SIGNALING_PATHWAY         | 0.553779313             | 2.136836446 | $1.08 \times 10^{-7}$  | $4.97 \times 10^{-6}$ |
| KEGG_ANTIGEN_PROCESSING_AND_PRESENTATION          | 0.584024091             | 2.159257191 | $4.14 \times 10^{-7}$  | $1.46 \times 10^{-5}$ |
| KEGG_CELL_CYCLE                                   | 0.50671887              | 2.020615359 | $4.76 \times 10^{-7}$  | $1.46 \times 10^{-5}$ |
| KEGG_NATURAL_KILLER_CELL_MEDIATED_CYTOTOXICITY    | 0.458287054             | 1.845283774 | $1.35 \times 10^{-5}$  | 0.000353677           |
| KEGG_PRIMARY_IMMUNODEFICIENCY                     | 0.628979463             | 2.017554711 | $4.87 \times 10^{-5}$  | 0.001120748           |
| KEGG_TYPE_I_DIABETES_MELLITUS                     | 0.633455869             | 2.077017265 | $6.79 \times 10^{-5}$  | 0.001388856           |
| KEGG_LEISHMANIA_INFECTION                         | 0.519389742             | 1.878037739 | 0.00012709             | 0.002338529           |
| KEGG_NOD_LIKE_RECEPTOR_SIGNALING_PATHWAY          | 0.535568257             | 1.887669217 | 0.00015771             | 0.002418322           |
| KEGG_NEUROACTIVE_LIGAND_RECEPTOR_INTERACTION      | 0.353923727             | 1.587136899 | 0.00014480             | 0.002418322           |
| KEGG_ALLOGRAFT_REJECTION                          | 0.621865679             | 1.962809942 | 0.00035549             | 0.005031667           |
| KEGG_AUTOIMMUNE_THYROID_DISEASE                   | 0.56512678              | 1.922360238 | 0.00054473             | 0.007159383           |
| KEGG_DNA_REPLICATION                              | 0.598740281             | 1.933635521 | 0.00060146             | 0.007377965           |
| KEGG_CYTOSOLIC_DNA_SENSING_PATHWAY                | 0.534003885             | 1.858879789 | 0.00078734             | 0.009054405           |
| KEGG_HEMATOPOIETIC_CELL_LINEAGE                   | 0.432663725             | 1.639223084 | 0.00229221             | 0.024809897           |
| KEGG_OLFACTORY_TRANSDUCTION                       | 0.400324108             | 1.572810769 | 0.00251892             | 0.025749007           |
| KEGG_ECM_RECEPTOR_INTERACTION                     | 0.444142135             | 1.672485837 | 0.00324008             | 0.029808806           |
| KEGG_P53_SIGNALING_PATHWAY                        | 0.452653972             | 1.633389617 | 0.00322361             | 0.029808806           |
| KEGG_DRUG_METABOLISM_CYTOCHROME_P450              | -0.502895941            | -1.72024873 | 0.00354733             | 0.031081397           |
| KEGG_INTESTINAL_IMMUNE_NETWORK_FOR_IGA_PRODUCTION | 0.504285944             | 1.703917901 | 0.00397158             | 0.033216922           |
| KEGG_SELENOAMINO_ACID_METABOLISM                  | -0.597839383            | -1.71466946 | 0.00666488             | 0.053319049           |
| KEGG_FOCAL_ADHESION                               | 0.326078087             | 1.401269548 | 0.008313               | 0.063733004           |
| KEGG_JAK_STAT_SIGNALING_PATHWAY                   | 0.343907434             | 1.432716104 | 0.00895094             | 0.065878935           |
| KEGG_PROXIMAL_TUBULE_BICARBONATE_RECLAMATION      | -0.617513679            | -1.72548727 | 0.01106885             | 0.069664229           |
| KEGG_PROPANOATE_METABOLISM                        | -0.546078313            | -1.64921165 | 0.01135829             | 0.069664229           |
| KEGG_FATTY_ACID_METABOLISM                        | -0.519558988            | -1.64416313 | 0.01089810             | 0.069664229           |
| KEGG_HOMOLOGOUS_RECOMBINATION                     | 0.553763541             | 1.640501432 | 0.01048946             | 0.069664229           |
| KEGG_OOCYTE_MEIOSIS                               | 0.376783932             | 1.465837121 | 0.01124104             | 0.069664229           |
| KEGG_MISMATCH_REPAIR                              | 0.577641773             | 1.643586088 | 0.01300030             | 0.07475178            |
